# Supplementary material
Source: PubMed Central journal article supplement (PMC2755621)
Supplement: NIHMS117253-supplement-01.pdf [file NIHMS117253-supplement-01.pdf]

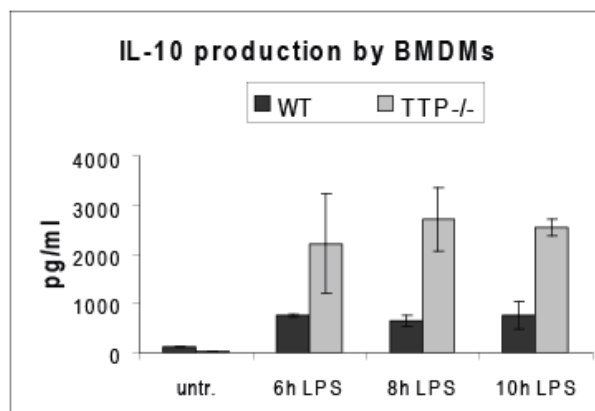

**Supplemental Figure S1.** TTP-deficient BMDMs produced more IL-10 cytokine after stimulation with LPS. WT and TTP-/- BMDMs were stimulated for 6, 8 or 10 h with LPS. Amounts of IL-10 in supernatants were determined by ELISA.

A

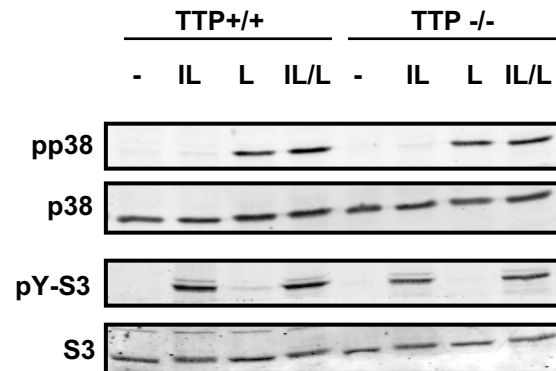

B

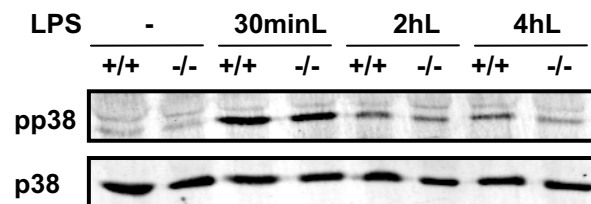

**Supplemental Figure S2.** p38MAPK and Stat3 activation by LPS or IL-10, respectively, are not affected by inactivation of the TTP gene. *A*, Activation of Stat3 and p38MAPK in LPS-treated TTP<sup>+/+</sup> and TTP<sup>-/-</sup> BMDMs. Cells treated for 30 min with IL-10 (IL), LPS (L), or IL-10 + IL-10 (IL/L) were examined for activation of p38MAPK by Western blotting using phospho-p38MAPK antibody (pp38). Membranes were reprobed with p38 antibody for loading control, and phospho-Stat3 antibody (pY-S3) to reveal activation of Stat3. *B*, Activation of p38MAPK in LPS-treated TTP<sup>+/+</sup> and TTP<sup>-/-</sup> BMDMs. Whole cell extracts of TTP<sup>+/+</sup> and TTP<sup>-/-</sup> BMDMs treated for 30 min, 2 h or 4 h with LPS (L) or left untreated (-) were analyzed for activation of p38MAPK by Western blotting using phospho-p38MAPK antibody (pp38). Membrane was reprobed with p38MAPK antibody (p38) for loading control.

A

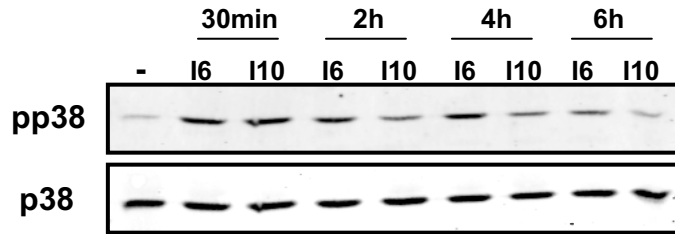

B

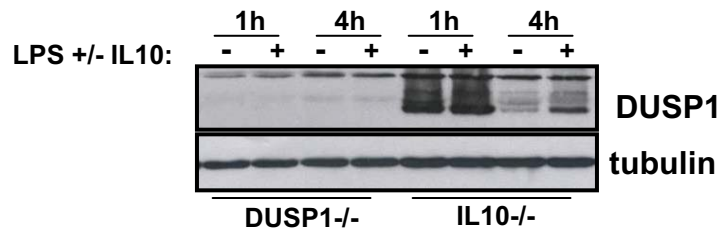

C

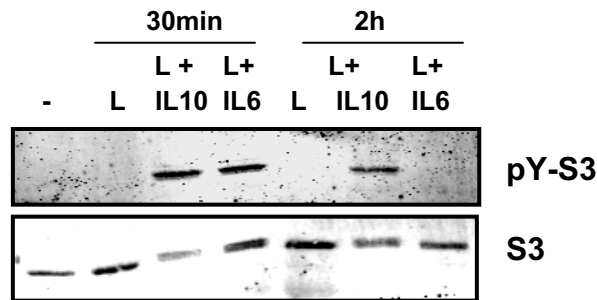

**Supplemental Figure S3.** IL-10 causes a decrease in p38MAPK phosphorylation, increase in DUSP1 expression, and a prolonged activation of Stat3. *A*, Whole cell extracts of BMDMs treated for 30 min, 2 h, 4 h and 6 h with LPS+IL-6 or LPS+IL-10 were analyzed for activation of p38MAPK by Western blotting using antibody to activated p38MAPK (pp38). Antibody to total p38MAPK (p38) was used for loading control. *B*, Whole cell extracts of DUSP1<sup>-/-</sup> and IL-10<sup>-/-</sup> BMDMs treated for 1 h and 4 h with LPS alone or LPS+IL-10 were analyzed for DUSP1 expression by Western blotting. Antibody to tubulin was used for loading control. IL-10<sup>-/-</sup> cells were used instead of WT BMDMs in order to increase the sensitivity to treatment with exogenous IL-10. *C*, BMDMs were treated for 30 min and 2 h with LPS alone or in combination with either IL-10 or IL-6. Stat3 activation was determined by Western blotting of whole cell extracts with antibody directed to tyrosine-phosphorylated Stat3 (pY-S3). Antibody to total Stat3 (S3) was used for loading control.

A

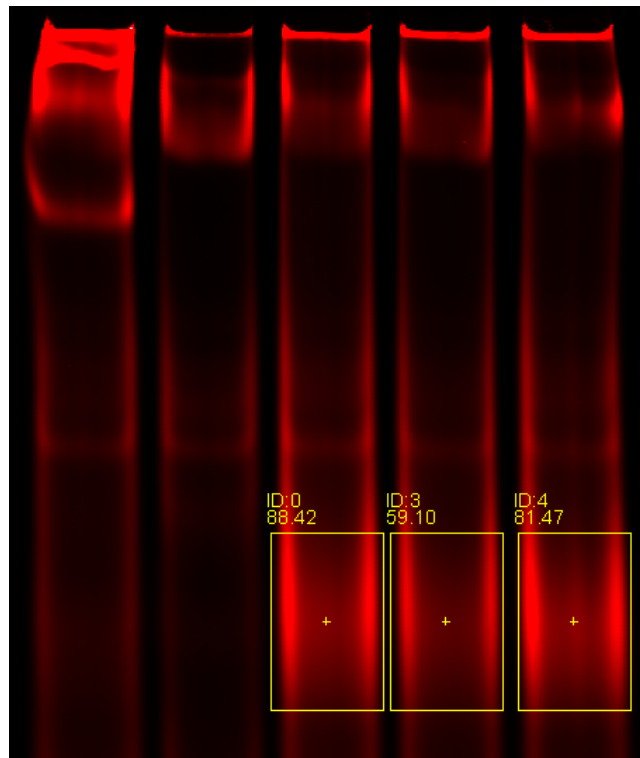

B

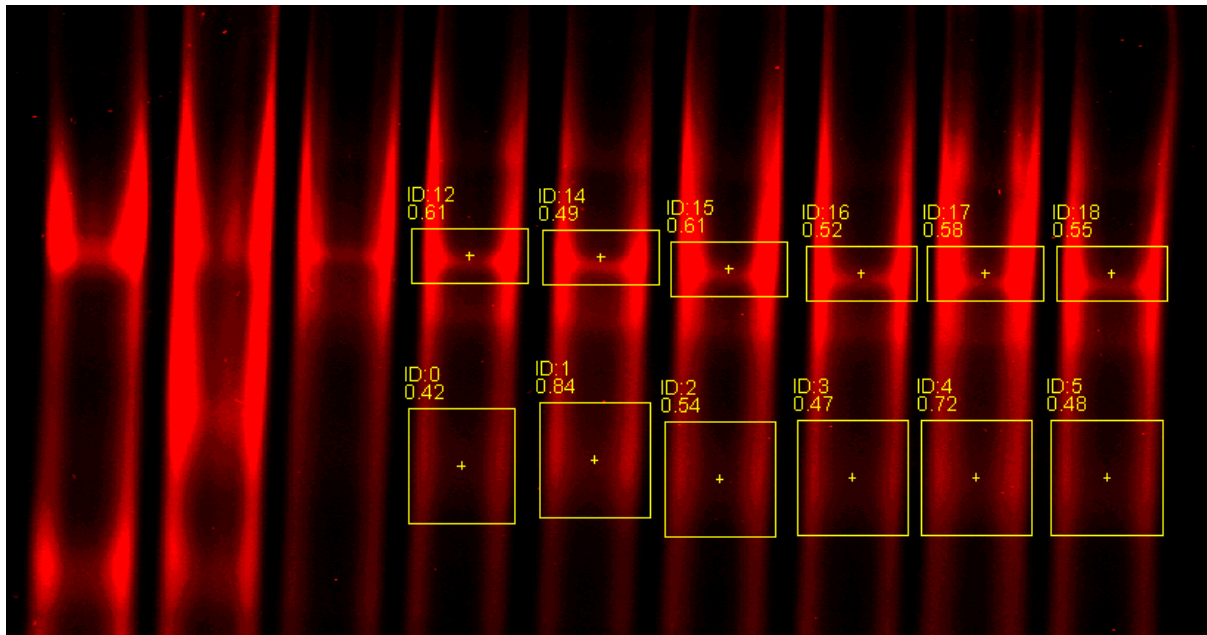

**Supplemental Figure S4.** Quantitative analysis of TTP-ARE complexes. The fluorescence signal of the Cy5.5-labeled TNF $\alpha$  ARE within the equally-sized rectangles positioned at the TTP-ARE complexes was measured and quantified (median background setting) using the LI-COR Odyssey system. The signal intensities are depicted. *A*, EMSA from the Fig. 5B. Equal amounts of the same extracts used for this EMSA were also used for the TTP Western blot in Fig. 5A, thus allowing for TTP loading control. *B*, EMSA from the Fig. 5E. The signal of TTP-ARE complexes (lower rectangles) were first normalized to the unspecific signals (upper rectangles) in the corresponding lanes before the relative intensities were calculated for the Fig. 5E.
